# Supplementary material for: Ten-year risk of fatal cardiovascular disease and its association with metabolic risk factors among waste pickers in South Africa
Source: Springer Nature journal article supplement (doi:10.1186/s12872-021-02150-y), 2021-07-10
Supplement: MOESM1 [file 19350028]

# Waste pickers

Please complete the survey below.

Thank you!

---

Study ID

\_\_\_\_\_

---

Consent obtained

- Yes  
 No

---

Reason consent not obtained

- Refused  
 Not enough time  
 Language barrier

---

Date of interview

\_\_\_\_\_

---

Name of interviewer

\_\_\_\_\_

---

Name of landfill site

- Goudkoppies  
 Marie Louise

---

Respondents' suburb

\_\_\_\_\_

---

## Demographic and Household Info.

---

Age

\_\_\_\_\_

---

Gender

- Male  
 Female

---

Main language spoken

- English  
 Afrikaans  
 Zulu  
 Xhosa  
 Ndebele  
 Sepedi  
 Sesotho  
 Setswana  
 Tsonga  
 Swati  
 Venda  
 Other

---

Specify Other language

\_\_\_\_\_

---

What is the level of education obtained

- No schooling
- Primary school
- Secondary school
- Tertiary level

---

Country of birth

- South African
- Other

---

If other, please name country

---

---

If other, years lived in S.A

---

---

Province of birth

- Gauteng
- Free State
- North West
- Eastern Cape
- Northern Cape
- Western Cape
- Mpumalanga
- Limpopo
- KwaZulu-Natal

---

How long have you lived in JHB?

---

---

Where did you live before moving to JHB

---

---

Why did you move to JHB?

---

---

Do you live on or adjacent to a landfill?

- Yes
- No

---

Do you live in a:

- Formal house
- Informal dwelling
- Back yard dwelling/room - formal
- Back yard dwelling/room - informal
- Other ( e.g. veld, bushes, street)

---

What do you mainly use for cooking at home?

- Electricity
- Paraffin
- Gas
- Wood
- Coal
- Other

---

What do you mainly use for heating at home?

- Electricity
- Paraffin
- Gas
- Wood
- Coal
- Other

---

Where do you mainly get your water from at home?

- River/stream
- Household tap
- Communal tap
- Borehole
- Other

---

Do you have access to toilet facilities where you live?

- Yes
- No

---

If yes, what type of toilet?

- Private flush toilet
- Communal flush toilet
- Pit latrine
- Chemical toilet
- Other

---

Do you have access to a place to wash yourself/hands at home?

- Yes
- No

---

How many people are there in your household?

---

---

How many adults (15 yrs and older)

---

---

how many children (14 yrs and younger)

---

---

Are you the sole bread winner for your household?

- Yes
- No

---

How many people do you support financially?

---

---

What is your average monthly income?

---

---

Do you receive any grants?

- Yes
- No

---

If yes, please indicate

- Pension
- Disability
- Child support

---

How much do you spend on Food every month?

---

---

How much do you spend on Transport (include taxi fare, petrol, car instalment) monthly

---

---

How much do you spend on Transport of waste where you sell it monthly?

---

---

How much do you spend on housing (rent, bond, etc) monthly

---

---

How much do you spend on Water monthly

\_\_\_\_\_

---

How much do you spend on Electricity monthly

\_\_\_\_\_

---

How much do you spend on Paraffin monthly

\_\_\_\_\_

---

How much do you spend on Coal monthly

\_\_\_\_\_

---

How much do you spend on Wood monthly

\_\_\_\_\_

---

How much do you spend on Gas

\_\_\_\_\_

---

How much do you spend on other type of fuel monthly

\_\_\_\_\_

---

Specify other type of fuel

\_\_\_\_\_

---

How much do you spend on Alcohol monthly

\_\_\_\_\_

---

How much do you spend on Cigarettes monthly

\_\_\_\_\_

---

How much do you spend on phone monthly

\_\_\_\_\_

---

How much do you spend on medical expenses monthly

\_\_\_\_\_

---

How much do you spend on Schooling or University monthly

\_\_\_\_\_

---

How much do you spend on debt repayment monthly

\_\_\_\_\_

---

How much do you spend on entertainment monthly ( movies etc.)

\_\_\_\_\_

---

Specify type of entertainment

\_\_\_\_\_

---

Do you have medical aid?

- Yes
- No

Where do you get your food from? (choose all that apply)

- Grow your own food  
 Buy food  
 From charities  
 From other waste pickers you work with  
 From landfill site  
 Other

If other, please explain

---

### Food security (Community Child Hunger Identification Project Index - CCHIP)

Has your household ever run out of money to buy food in the past 30 days?

- Yes  
 No

Has your household ever run out of money to buy food 5 or more days in the past 30 days?

- Yes  
 No

Ever rely on limited number of foods to feed children because you are running out of money for food in the past 30 days?

- Yes  
 No

Ever rely on limited foods because you ran out of money for food 5 or more days in past 30 days?

- Yes  
 No

Ever cut meal size or skip meals because there is not enough money for food in past 30 days?

- Yes  
 No

Ever cut meal size or skip meals because there is not enough money for food in 5 or more days in past 30 days?

- Yes  
 No

Ever eat less because there is not enough food in the past 30 days?

- Yes  
 No

Ever eat less because there is not enough food in 5 or more days in the past 30 days?

- Yes  
 No

Do your children ever eat less because there is not enough money in the past 30 days?

- Yes  
 No

Do your children ever eat less because there is not enough in 5 or more days in the past 30 days?

- Yes  
 No

Do your children ever say they are hungry because there is not enough food in the house in the past 30 days ?

- Yes  
 No

Do your children ever say they are hungry because not enough food in the house 5 or more days in the past 30 days ?

- Yes  
 No

Ever cut meal size of children or skip meals because not enough money to buy food in past 30 days?

- Yes  
 No

---

Ever cut meal size of children or skip meals because not enough money to buy food 5 or more days in past 30 days?  Yes  
 No

---

Do any of children ever go to bed hungry because not enough money for food in the past 30 days?  Yes  
 No

---

Do your children go to bed hungry because not enough money for food in 5 or more days in past 30 days?  Yes  
 No

---

**Occupational history**

---

Apart from collecting recyclable material and getting grants, do you get money from any other sources?  Yes  
 No

---

If yes, what are these other sources of income? Please list them

\_\_\_\_\_

---

How much do you make in total from your other sources of income?

\_\_\_\_\_

---

Before working as a waste picker, what was your previous type of employment(s)

\_\_\_\_\_

---

What was the reason for leaving your last job?

\_\_\_\_\_

---

For how many years have you worked as a waste picker?

\_\_\_\_\_

---

How many days per week do you work on the landfill?

\_\_\_\_\_

---

How many hours per day are you on the landfill?

\_\_\_\_\_

---

On average, how many hours do you work per day?

\_\_\_\_\_

---

**Waste Picking**

---

Why did you choose waste picking?

\_\_\_\_\_

---

What do you like about waste picking?

\_\_\_\_\_

---

What don't you like about waste picking?

\_\_\_\_\_

---

Do you collect any of the following waste? (choose all that apply)

- Paper or cardboard  
 Plastic  
 Metals or cans  
 Electronic waste  
 glass  
 cloth  
 other

If other, please specify...

If you collect more than one type of material, which material do you collect the most of?

- Paper or cardboard  
 Plastic  
 Metals or cans  
 Electronic waste  
 glass  
 cloth  
 other

If other, please specify...

Do you only collect one type of waste per day?

- Yes  
 No

How much money do you earn from waste picking on a good day?

How much money do you earn from waste picking on a bad day?

What amount of waste do you remove on average per day, using a refuse black bag as reference?

How much does it weigh on average per day?

How do you transport your materials to the next location?

How often do you take the material to sell? (choose one)

- Daily  
 Twice weekly  
 Weekly  
 2 weeks  
 Monthly  
 Other

If other, explain...

Where do you take your waste to sell?

- Directly to the recycling centre  
 To dealers who will sell to recycling centre  
 Other

If other, elaborate

---

If you don't sell your waste everyday, where do you store the waste you have collected?

- At home  
 On this landfill  
 On another landfill  
 Other

---

If other, please elaborate...

---

---

Do you have access to toilet facilities at the landfill?

- Yes  
 No

---

If no, what do you do?

---

---

Do you think washing hands is important?

- Yes  
 No

---

Do you have access to water on the landfill?

- Yes  
 No

---

Do you eat on the landfill while working?

- Yes  
 No

---

Do you wash your hands before eating while working on the landfill site?

- Yes  
 No

---

Do you wash your hands at the end of the day, after work?

- Yes  
 No

---

What do you use to wash your hands? (choose all that apply)

- Water  
 Water and soap  
 Other

---

If other, what?

---

---

What do you use to protect yourself with while working?

- None  
 Masks  
 Gloves  
 Boots or closed shoes  
 Other

---

If other, please name

---

---

If yes, where did you get it from?

---

---

Do you wear them while working?

- Always  
 Sometimes  
 Never

---

If never, why not?

---



**Occupational Exposures**

Do you lift heavy objects while working on the landfill?  Yes  
 No

Have you ever been cut by the materials you handle on the landfill site?  Yes  
 No

Have you ever handled needles on the landfill site?  Yes  
 No

Have you ever been injured by a needle on the landfill site?  Yes  
 No

Have you ever handled blood on the landfill site?  Yes  
 No

Are there dogs on the landfill site?  Yes  
 No

Have you ever been attacked by a dog on the landfill site?  Yes  
 No

Have you seen rats/mice on the landfill site?  Yes  
 No

Have you ever been bitten by rodents on the landfill site?  Yes  
 No

How problematic are mosquitoes on the landfill site?  No problem  
 Moderate problem  
 Major problem

How problematic is airborne dust on the landfill site?  No problem  
 Moderate problem  
 Major problem

How problematic are strong gas smells on the landfill site?  No problem  
 Moderate problem  
 Major problem

Are there pools of dirty water on the surface of the landfill site?  Yes  
 No

Have you ever had waste fall on top of you?  Yes  
 No

Have you ever been hurt by waste falling on you?  Yes  
 No

Have you ever hurt yourself by falling on the landfill site?  Yes  
 No

have you ever seen a fire on the landfill site?  Yes  
 No

---

have you ever seen an explosion on the landfill site?  Yes  
 No

---

have you ever been injured by any type of vehicle on the landfill site?  Yes  
 No

---

Have you ever handled paint on the landfill site?  Yes  
 No

---

Have you ever handled chemicals, such as detergents or anything that smells very strong?  Yes  
 No

---

Have you ever been injured during violence involving another waste picker?  Yes  
 No

---

Have you ever been injured during violence involving security guards?  Yes  
 No

---

What 3 or more things that worry you the most about working on the landfill?

---

Do you think that the landfill site is a safe place to work?  Yes  
 No  
 Not sure

---

Do you experience any problems accessing the landfill site?  Yes  
 No

---

If your answer is Yes, please explain...

---

How do security guards at the landfill treat you?

---

Do you belong to any waste picker forum?  Yes  
 No

---

If Yes, in what ways does belonging to the forum help you?

---

---

## Health

---

Do you smoke currently?  Yes  
 No

---

If No, have you ever smoked?  Yes  
 No

---

---

If Yes, what do you smoke?

- Cigarettes
- Snuff
- Chewing tobacco
- Dagga/weed
- Hookah
- Other

---

If you smoke other, Please explain...

---

---

How much do you smoke/chew or snuff per day?

---

---

For how many years have you smoked?

---

---

How often do you have a drink containing alcohol?

- Never
- Monthly/less
- 2 to 4 times a month
- 2 to 3 times a week
- 4 or more times a week

---

How many drinks containing alcohol do you have on a typical day when you are drinking?

- 1 or 2
- 3 or 4
- 5 or 6
- 7 or 8 or 9
- 10 or more

---

How often do you have six or more drinks on one occasion?

- Never
- less than monthly
- Monthly
- Weekly
- Daily or almost daily

---

How often during the last year have you found that you were unable to stop drinking once started?

- Never
- less than monthly
- Monthly
- Weekly
- Daily or almost daily

---

How often during last year have you failed to do what was expected from you due to drinking?

- Never
- less than monthly
- Monthly
- Weekly
- Daily or almost daily

---

How often during the last year have you needed a first drink in morning after a heavy drinking session?

- Never
- less than monthly
- Monthly
- Weekly
- Daily or almost daily

---

How often during the last year have you had a feeling of guilt or remorse after drinking?

- Never
- less than monthly
- Monthly
- Weekly
- Daily or almost daily

---

How often during the last year have you been unable to remember night before due to drinking?

- Never
- less than monthly
- Monthly
- Weekly
- Daily or almost daily

---

have you or someone else been injured as a result of your drinking in the last year?

- No
- Yes
- True but not in the last year

---

Has a relative or a friend or a doctor or another health worker been concerned about your drinking?

- No
- Yes
- True but not in the last year

---

In general, would you say your health is...

- Excellent
- Very good
- Good
- Fair
- Poor

---

If fair or poor, please explain...

---

---

In the past 2 weeks, have you experienced Cough?

- Yes
- No

---

If you experienced cough, where did you seek treatment

- Clinic
- Doctor
- Traditional healer
- Self medicated
- Other
- No treatment sought

---

If treatment for cough was sought at other, please explain

---

---

In the past 2 weeks, have you experienced Itchy rash?

- Yes
- No

---

If you experienced Itchy rash in the past 2 weeks, where did you seek treatment?

- Clinic
- Doctor
- Traditional healer
- Self-medicated
- Other
- No treatment sought

---

If treatment for itchy rash was sought at other, please name

---

---

In the past 2 weeks, have you experienced runny/blocked nose?

- Yes
- No

---

If you experienced runny/blocked nose in the past 2 weeks, where did you seek treatment?

- Clinic
- Doctor
- Traditional healer
- Self medicated
- Other
- No treatment sought

---

If treatment for runny/blocked nose was sought at other, please name \_\_\_\_\_

---

In the past 2 weeks, have you experienced teary/watery eyes?

- Yes
- No

---

If you experienced teary/watery eyes in the past 2 weeks, where did you seek treatment?

- Clinic
- Doctor
- Traditional healer
- Self medicated
- Other
- No treatment sought

---

If treatment for teary/watery eyes was sought at other, please name \_\_\_\_\_

---

In the past 2 weeks, have you experienced sneezing?

- Yes
- No

---

If you experienced sneezing in the past 2 weeks, where did you seek treatment?

- Clinic
- Doctor
- Traditional healer
- Self-medicated
- Other
- No treatment sought

---

If treatment for sneezing was sought at other, please name \_\_\_\_\_

---

In the past 2 weeks, have you experienced breathlessness?

- Yes
- No

---

If you experienced breathlessness in the past 2 weeks, where did you seek treatment?

- Clinic
- Doctor
- Traditional healer
- Self-medicated
- Other
- No treatment sought

---

If treatment for breathlessness was sought at other, please name \_\_\_\_\_

---

In the past 2 weeks, have you experienced rapid breathing?

- Yes
- No

---

If you experienced rapid breathing in the past 2 weeks, where did you seek treatment?

- Clinic
- Doctor
- Traditional healer
- Self medicated
- Other
- No treatment sought

---

If treatment for rapid breathing was sought at other, please name \_\_\_\_\_

---

In the past 2 weeks, have you experienced rapid heart rate?

- Yes  
 No
- 

If you experienced rapid heart rate in the past 2 weeks, where did you seek treatment?

- Clinic  
 Doctor  
 Traditional healer  
 Self medicated  
 Other  
 No treatment sought
- 

If treatment for rapid heart rate was sought at other, please name \_\_\_\_\_

---

In the past 2 weeks, have you experienced nausea/vomiting?

- Yes  
 No
- 

If you experienced nausea/vomiting in the past 2 weeks, where did you seek treatment?

- Clinic  
 Doctor  
 Traditional healer  
 Self medicated  
 Other  
 No treatment sought
- 

If treatment for nausea/vomiting was sought at other, please name \_\_\_\_\_

---

In the past 2 weeks, have you experienced diarrhoea?

- Yes  
 No
- 

If you experienced diarrhoea in the past 2 weeks, where did you seek treatment?

- Clinic  
 Doctor  
 Traditional healer  
 Self medicated  
 Other  
 No treatment sought
- 

If treatment for diarrhoea was sought at other, please name \_\_\_\_\_

---

In the past 2 weeks, have you experienced headache?

- Yes  
 No
- 

If you experienced headache in the past 2 weeks, where did you seek treatment?

- Clinic  
 Doctor  
 Traditional healer  
 Self-medicated  
 Other  
 No treatment sought
- 

If treatment for headache was sought at other, please name \_\_\_\_\_

---

In the past 2 weeks, have you experienced loss of coordination?

- Yes  
 No
-

---

If you experienced loss of coordination in the past 2 weeks, where did you seek treatment?

- Clinic
- Doctor
- Traditional healer
- Self medicated
- Other
- No treatment sought

---

If treatment for loss of coordination was sought at other, please name \_\_\_\_\_

---

In the past 2 weeks, have you experienced fever?

- Yes
- No

---

If you experienced fever in the past 2 weeks, where did you seek treatment?

- Clinic
- Doctor
- Traditional healer
- Self medicated
- Other
- No treatment sought

---

If treatment for fever was sought at other, please name \_\_\_\_\_

---

In the past 2 weeks, have you experienced muscle aches?

- Yes
- No

---

If you experienced muscle aches in the past 2 weeks, where did you seek treatment?

- Clinic
- Doctor
- Traditional healer
- Self medicated
- Other
- No treatment sought

---

If treatment for muscle aches was sought at other, please name \_\_\_\_\_

---

In the past 2 weeks, have you experienced dizziness?

- Yes
- No

---

If you experienced dizziness in the past 2 weeks, where did you seek treatment?

- Clinic
- Doctor
- Traditional healer
- Self medicated
- Other
- No treatment sought

---

If treatment for dizziness was sought at other, please name \_\_\_\_\_

---

In the past 2 weeks, have you experienced sunburn?

- Yes
- No

---

If you experienced sunburn in the past 2 weeks, where did you seek treatment?

- Clinic
- Doctor
- Traditional healer
- Self medicated
- Other
- No treatment sought

---

If treatment for sunburn was sought at other, please name \_\_\_\_\_

---

**Chronic Illness:**

Do you have now, or have you ever been diagnosed with Diabetes?

- Yes  
 No

---

If you have diabetes, where did you seek treatment?

- Clinic  
 Doctor  
 Traditional healer  
 Self-medicated  
 Other  
 No treatment sought

---

If treatment for diabetes was sought at other, please name \_\_\_\_\_

---

Do you have now, or have you ever been diagnosed with hypertension?

- Yes  
 No

---

If you have Hypertension, where did you seek treatment?

- Clinic  
 Doctor  
 Traditional healer  
 Self-medicated  
 Other  
 No treatment sought

---

If treatment for Hypertension was sought at other, please name \_\_\_\_\_

---

Do you have now, or have you ever been diagnosed with stroke?

- Yes  
 No

---

If you have been diagnosed with stroke, where did you seek treatment?

- Clinic  
 Doctor  
 Traditional healer  
 Self medicated  
 Other  
 No treatment sought

---

If treatment for stroke was sought at other, please name \_\_\_\_\_

---

Do you have now, or have you ever been diagnosed with asthma?

- Yes  
 No

---

If you have been diagnosed with Asthma, where did you seek treatment?

- Clinic  
 Doctor  
 Traditional healer  
 Self medicated  
 Other  
 No treatment sought

---

If treatment for Asthma was sought at other, please name \_\_\_\_\_



---

Do you have now, or have you ever been diagnosed with problems with vision?  Yes  
 No

---

If you have problems with Vision, where did you seek treatment?  Clinic  
 Doctor  
 Traditional healer  
 Self-medicated  
 Other  
 No treatment sought

---

If treatment for Vision was sought at other, please name \_\_\_\_\_

---

Do you have now, or have you ever been diagnosed with problems with hearing?  Yes  
 No

---

If you have problems with Hearing, where did you seek treatment?  Clinic  
 Doctor  
 Traditional healer  
 Self medicated  
 Other  
 No treatment sought

---

If treatment for Hearing was sought at other, please name \_\_\_\_\_

---

Do you have now, or have you ever been diagnosed with HIV?  Yes  
 No

---

If you have ever been diagnosed with HIV, where did you seek treatment?  Clinic  
 Doctor  
 Traditional healer  
 Self medicated  
 Other  
 No treatment sought

---

If treatment for HIV was sought at other, please name \_\_\_\_\_

---

Do you have now, or have you ever been diagnosed with TB?  Yes  
 No

---

If you have ever been diagnosed with TB, where did you seek treatment?  Clinic  
 Doctor  
 Traditional healer  
 Self medicated  
 Other  
 No treatment sought

---

If treatment for TB was sought at other, please name \_\_\_\_\_

---

Do you have now, or have you ever been diagnosed with mental illness?  Yes  
 No

If you have ever been diagnosed with mental illness, where did you seek treatment?

- Clinic  
 Doctor  
 Traditional healer  
 Self medicated  
 Other  
 No treatment sought

If treatment for mental illness was sought at other, please name \_\_\_\_\_

Do you have now, or have you ever been diagnosed with cancer?

- Yes  
 No

If you have ever been diagnosed with cancer, where did you seek treatment?

- Clinic  
 Doctor  
 Traditional healer  
 Self medicated  
 Other  
 No treatment sought

If treatment for cancer was sought at other, please name \_\_\_\_\_

Do you have now, or have you ever been diagnosed with some type of disability?

- Yes  
 No

If yes, where did you seek medical treatment?

- Clinic  
 Doctor  
 Traditional healer  
 Self medicated  
 Other

If treatment for disability was sought at other, please name \_\_\_\_\_

In the past 12 months, have you had a persistent cough for more than three weeks?

- Yes  
 No

If yes, how long did the coughing last? \_\_\_\_\_

Have you ever had wheezing or whistling in the chest in the last 12 months?

- Yes  
 No

If yes, how many attacks did you have in the last 12 months? \_\_\_\_\_

Did you seek medical attention?

- Yes  
 No

If yes, where did you go?

- Clinic  
 Hospital  
 Doctor  
 Traditional healer  
 Self-medicated  
 Other

---

If other, please elaborate further...

---

---

What was the diagnosis?

---

---

Are there times when something at the landfill in the environment affects your chest?

- Yes  
 No

---

If yes, how often have you experienced this?

- Everyday  
 Several times a week  
 About once a week  
 Once or twice a month  
 A few times in the past 6 months

---

If you know what it is please name it

---

---

Have you had an itchy rash that was coming and going for at least 6 months?

- Yes  
 No

---

Have you had this rash any time in the last 6 months?

- Yes  
 No

---

Has this rash affected folds of elbow?

- Yes  
 No

---

Has this rash affected behind knees?

- Yes  
 No

---

Has this rash affected in front of ankles?

- Yes  
 No

---

Has this rash affected under buttocks?

- Yes  
 No

---

Has this rash affected around neck, ears or eyes?

- Yes  
 No

---

Did you seek medical treatment for your skin rash?

- Yes  
 No

---

Where did you go?

- Clinic  
 Hospital  
 Doctor  
 Traditional healer  
 Self-medicated  
 Other

---

Explain other

---

---

Please state the diagnosis?

---

---

Have you ever been diagnosed with eczema by a doctor or nurse?

- Yes  
 No

---

Have you experienced diarrhoea, nausea or vomiting?

- Yes  
 No

---

If yes, how often in the past 6 months have you experienced this?

- Everyday  
 Several times a week  
 About once a week  
 Once or twice a month  
 A few times in the past 6 months

---

Did you seek medical treatment?

- Yes  
 No

---

Who provided the medical treatment?

- Clinic  
 Doctor  
 Traditional healer  
 Self medicated  
 Other

---

Have you ever been injured at work in the last 6 months(e.g. cuts, fracture, sprains and/or burns)?

- Yes  
 No

---

Fractures?

- Yes  
 No

---

If yes, how often?

- Everyday  
 Several times a week  
 About once a week  
 Once or twice a month  
 A few times in the past 6 months

---

Who provided treatment?

- Pikitup staff  
 Clinic  
 Doctor  
 Traditional healer  
 self-medicated  
 No treatment  
 Other

---

Sprains and muscle strains?

- Yes  
 No

---

How often?

- Everyday  
 Several times a week  
 About once a week  
 Once or twice a month  
 A few times in the past 6 months

---

Who provided the treatment?

- Pikitup staff
- Clinic
- Doctor
- Traditional healer
- self-medicated
- No treatment
- Other

---

Injured by landfill truck?

- Yes
- No

---

If injured by landfill truck, how often?

- Everyday
- Several times a week
- About once a week
- Once or twice a month
- A few times in the past 6 months

---

And who provided treatment?

- Pikitup staff
- Clinic
- Doctor
- Traditional healer
- self-medicated
- No treatment
- Other

---

Burns?

- Yes
- No

---

how frequent?

- Everyday
- Several times a week
- About once a week
- Once or twice a month
- A few times in the past 6 months

---

Who administered treatment

- Pikitup staff
- Clinic
- Doctor
- Traditional healer
- self-medicated
- No treatment
- Other

---

Hit by falling objects

- Yes
- No

---

How often are you hit by falling objects?

- Everyday
- Several times a week
- About once a week
- Once or twice a month
- A few times in the past 6 months

---

and who administered treatment?

- Pikitup staff
- Clinic
- Doctor
- Traditional healer
- self-medicated
- No treatment
- Other

---

Slips, trips and falls?

- Yes  
 No

---

how often do you experience slips, trips and falls?

- Everyday  
 Several times a week  
 About once a week  
 Once or twice a month  
 A few times in the past 6 months

---

Who gave treatment?

- Pikitup staff  
 Clinic  
 Doctor  
 Traditional healer  
 self-medicated  
 No treatment  
 Other

---

Cuts and lacerations?

- Yes  
 No

---

How often do you experience cuts and lacerations?

- Everyday  
 Several times a week  
 About once a week  
 Once or twice a month  
 A few times in the past 6 months

---

And who gave treatment?

- Pikitup staff  
 Clinic  
 Doctor  
 Traditional healer  
 self-medicated  
 No treatment  
 Other

---

Inhaling toxic fumes?

- Yes  
 No

---

how often do you inhale these fumes?

- Everyday  
 Several times a week  
 About once a week  
 Once or twice a month  
 A few times in the past 6 months

---

Who provided treatment when you needed one?

- Pikitup staff  
 Clinic  
 Doctor  
 Traditional healer  
 self-medicated  
 No treatment  
 Other

---

exposure to sudden loud noise?

- Yes  
 No

---

How often are you exposed to sudden loud noise?

- Everyday  
 Several times a week  
 About once a week  
 Once or twice a month  
 A few times in the past 6 months

---

Who provides treatment?

- Pikitup staff
- Clinic
- Doctor
- Traditional healer
- self-medicated
- No treatment
- Other

---

Other types of injury?

- Yes
- No

---

Please name other types

---

---

How often does this happen?

- Everyday
- Several times a week
- About once a week
- Once or twice a month
- A few times in the past 6 months

---

Who provided treatment when this happened?

- Pikitup staff
- Clinic
- Doctor
- Traditional healer
- self-medicated
- No treatment
- Other

---

If yes, please specify the type of injury...

- Fractures
- Sprains and muscle strains
- Injured by landfill truck
- Burns
- Being hit by falling objects
- trips and falls
- Cuts and lacerations
- Inhaling toxic fumes
- Exposure to sudden loud noise
- Other

---

If yes to 91.1, 91.3 or 91.4, please describe how you sustained your injury or injuries?

---

---

In the past 12 months, have you suffered from any body pains?

- Yes
- No

---

If yes, which of the following body pain?

- Back pain
- Joint pain
- Stiffness
- Other

---

If other body pains please specify:

---

---

Did you seek medical treatment for your body pain?

- Yes
- No

---

Who offered the medical treatment?

- Clinic
- Doctor
- Traditional healer
- Self medicated
- Other

---

Do you have difficulty hearing or understanding people around you?

- Yes
- No

---

If yes, did you have a hearing problem before working on the landfill?

- Yes
- No

---

Is there a history of hearing problems or deafness in your family?

- Yes
- No

---

Have you ever been diagnosed with any of the following?

- No
- Ear infection
- Meningitis
- TB
- Mumps/measles

---

In the past 12 months, have you missed work due to any illness or injury?

- Yes
- No

---

If yes, please specify the illness or injury

---

---

Do you think your illness or injury was related to your work?

- Yes
- No

---

If yes, please give details

---

---

how many times have you been pregnant?

- 0
- 1
- 2
- 3
- 4
- 5
- 6
- 7
- 8
- 9
- 10
- 11
- 12
- 13
- 14
- 15



---

How many children do you have?

- 0
- 1
- 2
- 3
- 4
- 5
- 6
- 7
- 8
- 9
- 10
- 11
- 12
- 13
- 14
- 15

---

Have you ever had a miscarriage?

- Yes
- No

---

If yes, when did it happen?

- Before working as a waste picker
- While working as a waste picker

---

If yes, how many miscarriages?

---

---

Have you ever had a still birth?

- Yes
- No

---

If yes, when did this happen?

- Before working as a waste picker
- While working as a waste picker

---

If yes, how many still births?

---

---

Was your last/ most recent pregnancy expected or not a surprise?

- Yes
- No

---

How long did it take you to fall pregnant?

- Years
- Months
- Don't know

---

Were you using contraceptives before you fell pregnant?

- Yes
- No

---

If yes, when did you stop your contraceptives?

- Years
- Months
- Don't know

---

Why did you stop your contraceptives?

- Fell pregnant
- Side effects
- Cost
- Religion
- N/A
- Other

---

What was the outcome of this pregnancy?

- Miscarriage  
 Still birth  
 Live birth
- 

How many weeks were you when you delivered your last baby?

\_\_\_\_\_

---

What was the birth weight of you most recent child?

\_\_\_\_\_

---

### **Mental Health Screening**

---

Do you often have headaches?

- Yes  
 No
- 

Is your appetite poor?

- Yes  
 No
- 

Do you sleep badly?

- Yes  
 No
- 

Are you easily frightened?

- Yes  
 No
- 

Do your hands shake?

- Yes  
 No
- 

Do you feel nervous, tense or worried?

- Yes  
 No
- 

Is your digestion poor?

- Yes  
 No
- 

Do you have trouble thinking clearly?

- Yes  
 No
- 

Do you feel unhappy?

- Yes  
 No
- 

Do you cry more than usual?

- Yes  
 No
- 

Do you find it difficult to enjoy your daily activities?

- Yes  
 No
- 

Do you find it difficult to make decisions?

- Yes  
 No
- 

Is your daily work suffering?

- Yes  
 No
- 

Are you unable to play a useful part in life?

- Yes  
 No
-

---

Have you lost interest in things?  Yes  
 No

---

Do you feel that you are a worthless person?  Yes  
 No

---

Has the thought of ending your life been on your mind?  Yes  
 No

---

Do you feel tired all the time?  Yes  
 No

---

Do you have uncomfortable feelings in your stomach?  Yes  
 No

---

Are you tired easily?  Yes  
 No

---

In the last 12 months, did you go to a clinic or hospital to see a doctor or nurse?  Yes  
 No

---

Do you attend the local clinic?  Where you live  
 Where you work  
 Any

---

Do you always go to the same clinic?  Yes  
 No

---

If no, please explain

\_\_\_\_\_

---

What obstacles or barriers do you face when needing to access health care services?

- Transport problems
- Unable to pay for services
- Unable to take time off work during the day
- No services available in the community where I live
- No services available close to where I work
- Have problems getting child care
- Language problems
- Went to the clinic, but was turned away
- Poor quality of services or care
- Long waiting list to see the doctor or nurse
- Other

---

If other obstacles, please name them.

\_\_\_\_\_

---

What would you consider as the major obstacle you faced when accessing health care services?

\_\_\_\_\_

---

Do you feel that you are treated well at the clinic or hospital?  Yes  
 No

---

Do you feel that you are treated differently or discriminated against at the clinic or hospital?  Yes  
 No

---

Please explain your answer

---

---

have you ever been admitted to a hospital?

- Yes  
 No
- 

If yes, when were you admitted and what was the diagnosis?

---

---

How would you rate your quality of life?

- Very poor  
 Poor  
 Neither poor nor good  
 Good  
 Very good
- 

---

How satisfied are you with your health?

- Very dissatisfied  
 Dissatisfied  
 Neither satisfied nor dissatisfied  
 Satisfied  
 Very satisfied
- 

---

How satisfied are you with your access to health care services?

- Very dissatisfied  
 Dissatisfied  
 Neither satisfied nor dissatisfied  
 Satisfied  
 Very satisfied
- 

---

How satisfied are you with your capacity to work?

- Very dissatisfied  
 Dissatisfied  
 Neither satisfied nor dissatisfied  
 Satisfied  
 Very satisfied
- 

---

To what extent do you feel that physical pain prevents you from doing what you need to do?

- Not at all  
 A little  
 A moderate amount  
 Very much  
 An extreme amount
- 

---

How much do you enjoy life?

- Not at all  
 A little  
 A moderate amount  
 Very much  
 An extreme amount
- 

---

To what extent do you feel your life to be meaningful?

- Not at all  
 A little  
 A moderate amount  
 Very much  
 An extreme amount
- 

---

How much do you fear the future?

- Not at all  
 A little  
 A moderate amount  
 Very much  
 An extreme amount
-

---

How much do you worry about your health?

- Not at all
- A little
- A moderate amount
- Very much
- An extreme amount

---

How much are you able to concentrate?

- Not at all
- A little
- A moderate amount
- Very much
- An extreme amount

---

How safe do you feel in your daily life?

- Not at all
- A little
- A moderate amount
- Very much
- An extreme amount

---

How healthy is your physical environment?

- Not at all
- A little
- A moderate amount
- Very much
- An extreme amount

---

### Biochemistry test results

Systolic blood pressure

---

---

Diastolic blood pressure

---

---

Fasting blood glucose

---

---

Haemoglobin

---

---

Cholesterol

---
